# Supplementary material
Source: PubMed Central journal article supplement (PMC3070833)
Supplement: NIHMS230563-supplement-supplement_1.pdf [file NIHMS230563-supplement-supplement_1.pdf]

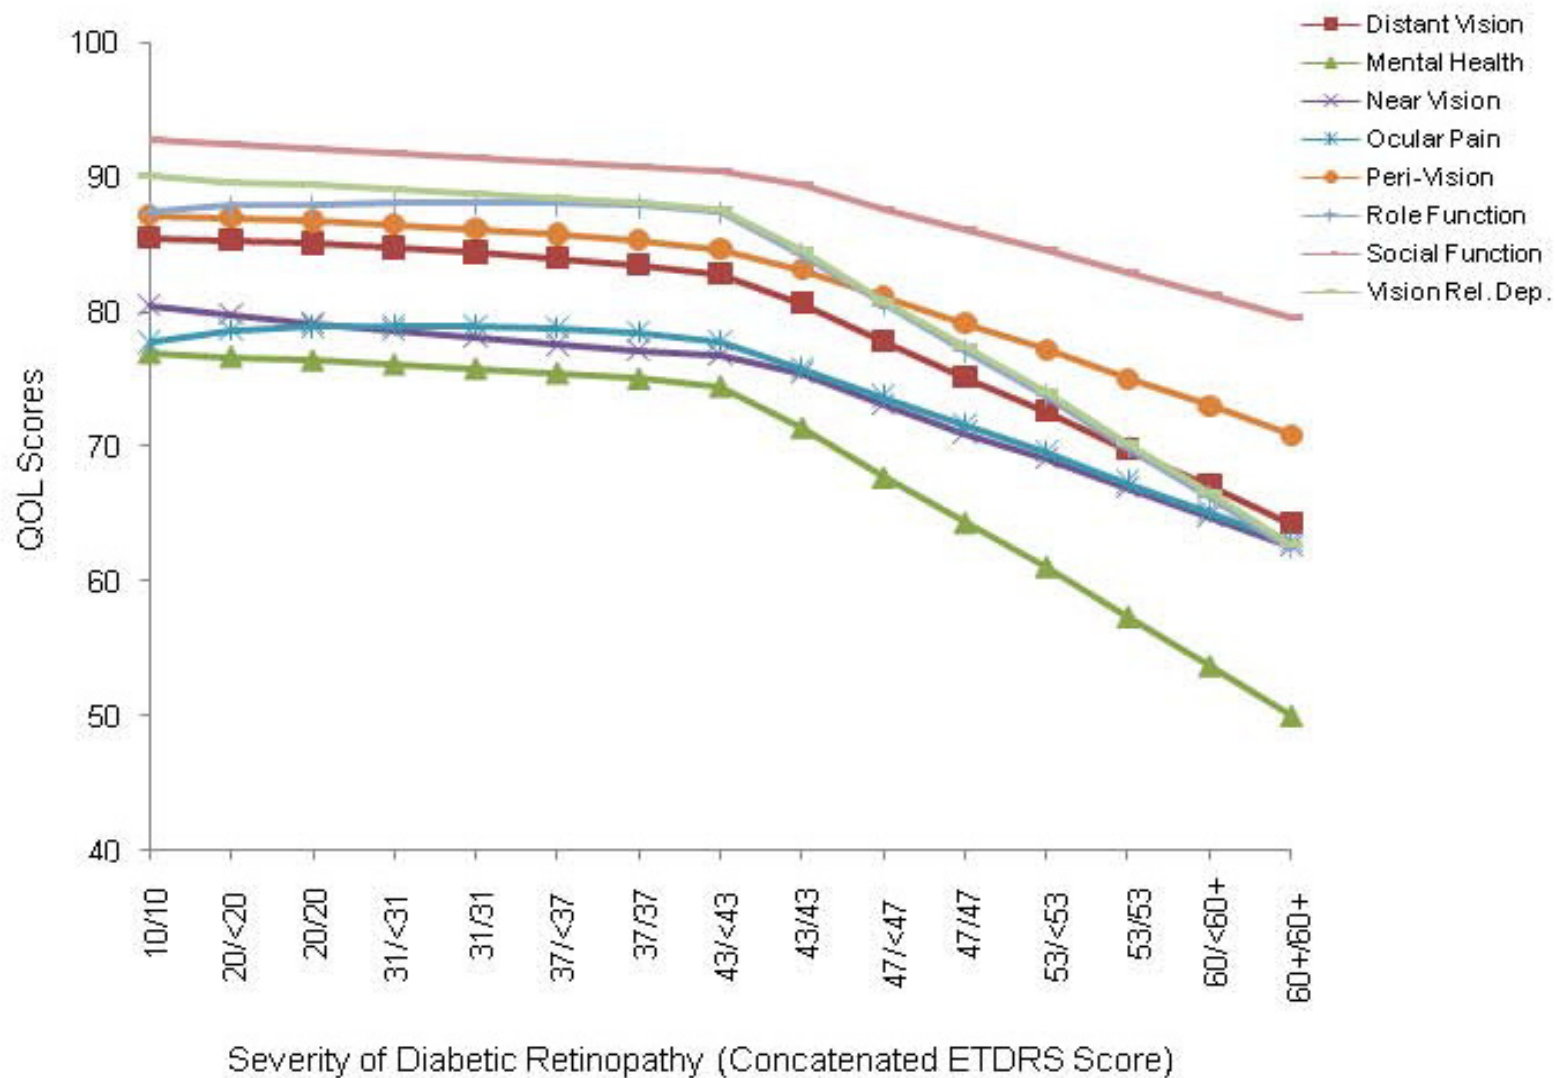

**Figure 3:** Relationship between National Eye Institute-Visual Function Questionnaire-25 (NEI-VFQ25) sub-scale scores (Quality of Life [QOL] Scores) for distance vision, mental health, near vision, ocular pain, peripheral vision, role function, social function, and vision related dependence subscale scores and severity of diabetic retinopathy based on the concatenated scale with a locally weighted regression plot (LOWESS). Early Treatment Diabetic Retinopathy Study (ETDRS) scores correspond to the following clinical severity levels: No DR (levels 10 through 13; unilateral or bilateral nonproliferative DR (NPDR; levels 14 through 53); unilateral or bilateral proliferative DR (PDR; levels 60 through 85). DR Severity Concantenated scale step 9 (43/43) corresponds to bilateral moderate NPDR. The NEIVFQ25 scores have been adjusted for covariates.
